# Supplementary material for: One-pot construction of Quenchbodies using antibody-binding proteins
Source: Royal Society of Chemistry journal article supplement (doi:10.1039/c6ay02108e), 2016-01-01
Supplement: c6ay02108e1.pdf [file c6ay02108e1.pdf]

**Supporting information for**

**One-pot construction of Quenchbodies using antibody binding proteins**

Hee-Jin Jeong<sup>a†</sup>, Tomoki Kojima<sup>b</sup>, Jinhua Dong<sup>a</sup>, Hiroyuki Ohashi<sup>b,c</sup> and Hiroshi Ueda<sup>a</sup>

<sup>a</sup>. Laboratory for Chemistry and Life Science, Institute for Innovative Research, Tokyo Institute of Technology, Japan.

e-mail: ueda@res.titech.ac.jp.

<sup>b</sup>. Department of Chemistry and Biotechnology, School of Engineering, The University of Tokyo, Japan.

<sup>c</sup>. Ushio Inc., Japan

<sup>†</sup> Current address: Dana-Farber Cancer Institute, USA.

## SI EXPERIMENTAL PROCEDURES

### Construction of murine IgG<sub>1</sub> anti-BGP Fab fragment

Since the pUQ1H vector for expressing anti-BGP Fab uses human antibody sequences for the constant region, we changed the C<sub>H1</sub> and C<sub>k</sub> domains to those of mouse antibody, and prepared mouse anti-BGP Fab. Mouse C<sub>H1</sub> gene was amplified using primers mIgG1CH1XhoBack and mIgG1CH1\_EagFor, pROX H chain<sup>1</sup> as a template, and KOD-plus DNA polymerase. Similarly, mouse V<sub>k</sub> gene was amplified using primers Histagback and VkHind+D, and pUQ1H as a template. Mouse C<sub>k</sub> gene was amplified using primers mCkBack and mCkBamfor, and pROX L chain<sup>1</sup> as a template. These three amplified fragments were connected by SOE PCR using mIgG1CH1XhoBack and mCKBamfor as primers, followed by ligation to *Xho*I- and *Bam*HI-digested pUQ1H(KTM219), resulting in pmUQ1H. The obtained plasmids were prepared using PureYield plasmid miniprep system, and the entire coding region sequences were confirmed.

### Biolayer Interferometry analysis

To investigate the interaction between Z<sub>mab22\_25</sub> and Fab fragments, a biolayer interferometry (BLI)-based biosensor BLItz system (FortéBio, Pall, Menlo Park, CA) was employed. BLI is a label-free technology for measuring biomolecular interactions within the interactome<sup>2</sup>. It analyzes the interference pattern of white light reflected from immobilized protein layer on the biosensor, and an internal reference layer. Binding of molecules to the biosensor causes a shift in the interference pattern that can be measured. For immobilization onto the biosensor, Z<sub>mab22\_25</sub> was biotinylated as specified by the manufacturer, diluted in kinetic buffer (10 mM sodium phosphate, 150 mM NaCl, 0.005% Tween 20, 0.1% bovine serum albumin, pH 7.4) and added to a streptavidin biosensor (FortéBio). Anti-BGP mouse-human chimeric Fab and human Fab at concentrations of 50~200 nM, 4 µL each in kinetic buffer were used as analytes. After immobilization of probe, we first ran the machine for 30 s to obtain the baseline, followed by the addition of antibody to obtain the association curve for

120 s. By soaking in 250  $\mu$ L of sample diluent, the dissociation curve was obtained for 180 s. Afterwards, the biosensor was regenerated by soaking for 60 s in 0.1 M glycine, pH 2.5. The association rate ( $k_{\text{on}}$ ) and dissociation rate ( $k_{\text{off}}$ ) constants, as well as their standard errors were calculated by fitting the curves using BLItz software. The  $K_A$  value was calculated by dividing  $k_{\text{on}}$  by  $k_{\text{off}}$ . Standard error (SE) of the ratio was calculated according to

$$\frac{M_1 \pm \varepsilon_1}{M_2 \pm \varepsilon_2} = \frac{M_1}{M_2} \pm \sqrt{\left(\frac{1}{M_2} \cdot \varepsilon_1\right)^2 + \left(\frac{M_1}{M_2^2} \cdot \varepsilon_2\right)^2} \quad (1)$$

where  $M_1$  ( $M_2$ ) and  $\varepsilon_1$  ( $\varepsilon_2$ ) are the mean and SE of  $k_{\text{on}}$  ( $k_{\text{off}}$ ), respectively.

**Table S1.** Nucleotide sequences of primers used in this study.

| Primer name      | Nucleotide sequence (5'-3')                                     |
|------------------|-----------------------------------------------------------------|
| GSx2PABack       | gggcggcggcagcggagggttcaaccgcacaacaaataacttc                     |
| GS3x1Pxfor       | cgctgccgcccctcattagactagtttacttc                                |
| GSx3PABack       | gggcggcggcagcggagggttcaggaggatcaaccgcacaacaaataacttc            |
| GS3x3PXfor       | cgctgccgcccgaaccgctccgctaccaccacctcattagactagtttacttc           |
| ProCXback        | cgaagtaaactgctctaag                                             |
| pROX2FabQ-Bamfor | cgctgctctgtagtcggatccactagtaacggc                               |
| Zmab22back       | gtggacaacaaattcaacaagaagcatggcgcgcacacatggaaattatcg             |
| Zmab25for        | caggcttgcaataaatcataggcctgaaatgcattcagattcggcagacgaataattccatgt |
| ZmabNdeBack      | ggaattcatatggctcaagtggacaacaaattcaacaag                         |
| ZmabNotFor       | ggaattcggcgccgctttcggctgtgcatc                                  |
| Zmab25-3back     | gcatttattgcaagcctgattgatgatccgagccagagcgcaaatctgctggccgaagc     |
| Zmab25-4for      | tttcggctgtgcatcattcagtttttctcggccagcag                          |
| mIgG1CH1XhoBack  | cggtcaccgtctcgagcgctaaaacgacaccccc                              |
| mIgG1CH1_EagFor  | atgatgtgcccgcacacaattttgtccacc                                  |
| Histagback       | tcggccgcacatcatcaccatcacgg                                      |
| VkHind+D         | cagcacgtttgattcaagcttgggtccccc                                  |
| mCkBack          | gaaatcaaacgtgctgatgctgaccaactg                                  |
| mCkBamfor        | tcgtcctttagtcggatccgccccctcattcctgttgaagctcttg                  |
| mIgG1CH1XhoBack  | cggtcaccgtctcgagcgctaaaacgacaccccc                              |

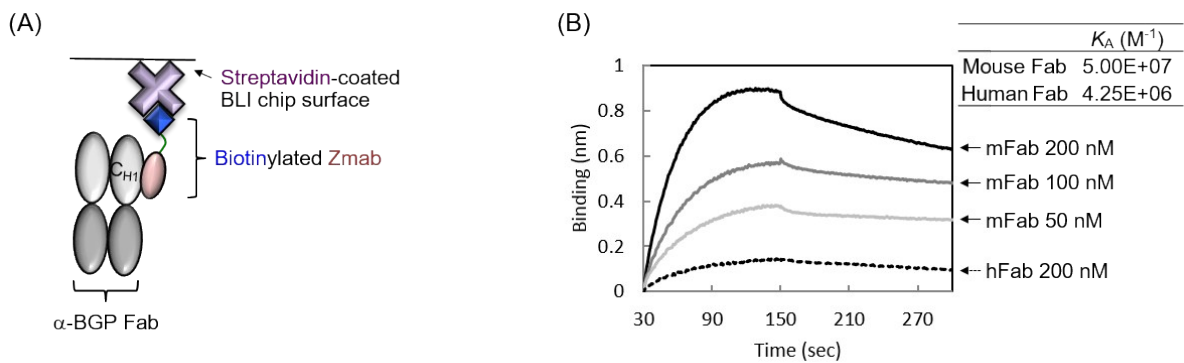

**Figure S1.** (A) Scheme of biolayer interferometry analysis. The C-terminally added Cys-tag was used for the biotinylation of Zmab<sub>22-25</sub>. (B) Binding activity of Zmab<sub>22-25</sub> to mouse IgG<sub>1</sub> and mouse-human chimeric Fab fragments.

## References

1. R. Abe, H. J. Jeong, D. Arakawa, J. Dong, H. Ohashi, R. Kaigome, F. Saiki, K. Yamane, H. Takagi and H. Ueda, *Sci Rep*, 2014, **4**.
2. R. L. Rich and D. G. Myszka, *Anal Biochem*, 2007, **361**, 1-6.
